# Supplementary material
Source: Springer Nature journal article supplement (https://www.springermedizin.de/resource/supplementary/13024_2008_57_MOESM2_ESM.pdf/9643286)
Supplement: MOESM2 [file 9643286]

$^{13}\text{C}$  NMR (126 MHz,  $\text{DMSO-}d_6$ )  $\delta$  ppm 151.43 ; 146.46 ; 140.33 ; 135.37 ; 134.54 ; 131.02 ; 128.01 ; 127.33 ; 124.48 ; 122.96 ; 117.37 ; 109.76 ; 101.59 ; 50.11 ; 49.53 ; 43.01 ; 41.64 ; 31.74 ; 21.11 ; 19.32 ; 18.62 ;

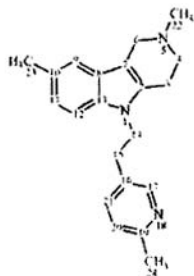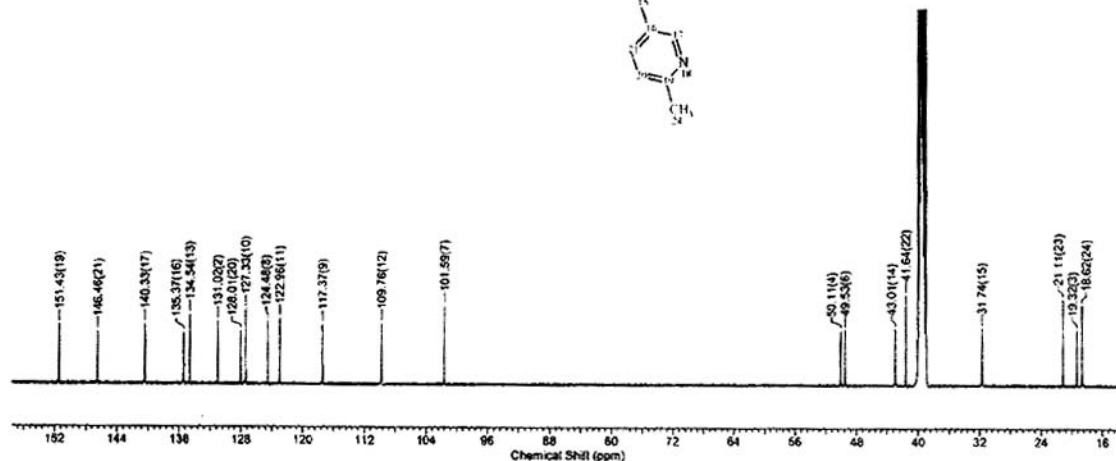

**Figure 2. Carbon spectrum in DMSO**
